# Supplementary material for: Lead-free AgBiI4 perovskite artificial synapses for a tactile sensory neuron system with information preprocessing function
Source: Royal Society of Chemistry journal article supplement (doi:10.1039/d2ma00675h), 2022-01-01
Supplement: d2ma00675h1.pdf [file d2ma00675h1.pdf]

## Supporting information

### **Lead-free AgBiI<sub>4</sub> perovskite artificial synapses for tactile sensory neuron system with information preprocessing function**

Haibo Ye<sup>1</sup>, Zhiyong Liu<sup>1\*</sup>, Hangdi Han<sup>1</sup>, Tielin Shi<sup>1</sup>, Guanglan Liao<sup>12</sup>

*<sup>1</sup>State Key Laboratory of Digital Manufacturing Equipment and Technology, Huazhong University of Science and Technology, Wuhan 430074, China*

*<sup>2</sup>Shenzhen Huazhong University of Science and Technology Research Institute, Shenzhen 518057, China*

*\* Address correspondence to: zhiyong\_liu@hust.edu.cn.*

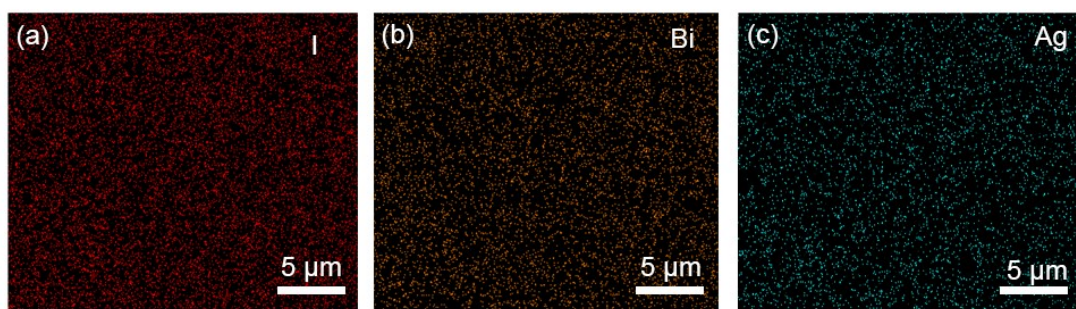

**Fig. S1** The energy dispersive spectroscopy (EDS) elemental mapping of the  $\text{AgBiI}_4$  components (Ag, Bi and I).

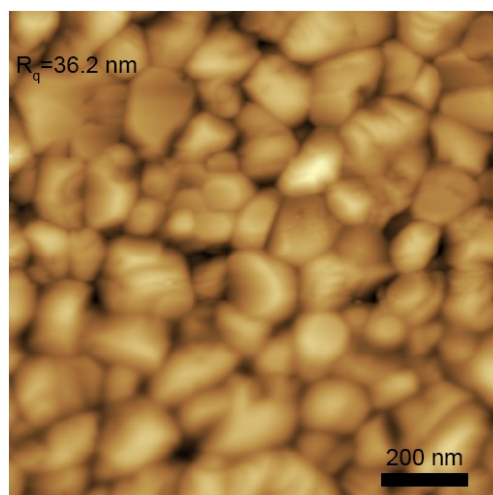

**Fig. S2** The AFM measurement of the AgBiI<sub>4</sub> film.

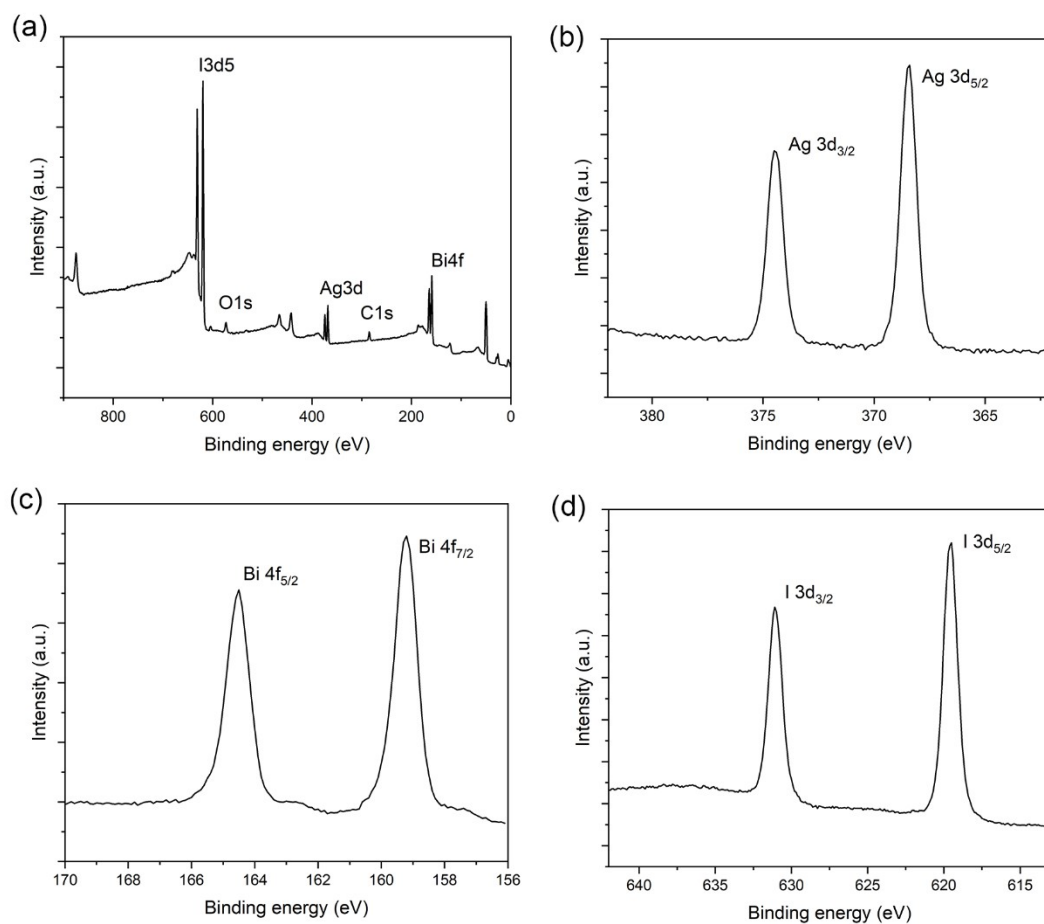

**Fig. S3** The X-ray photoelectron spectroscopy (XPS) spectrum of the Ag, Bi and I element in the AgBiI<sub>4</sub> film.

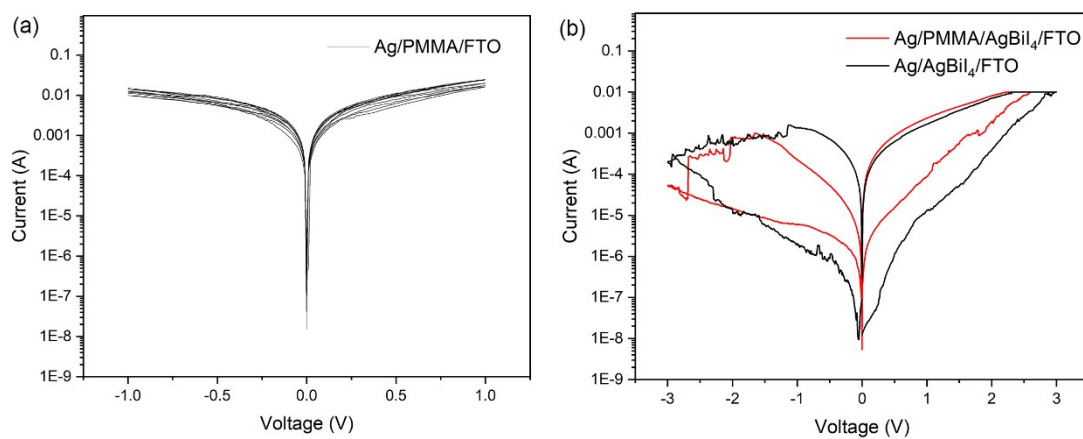

**Fig. S4** (a) The I-V characteristics of the PMMA with a structure of ITO/PMMA/Ag. (b) The I-V characteristics of the AgBiI<sub>4</sub> devices with or without PMMA insulating layer.

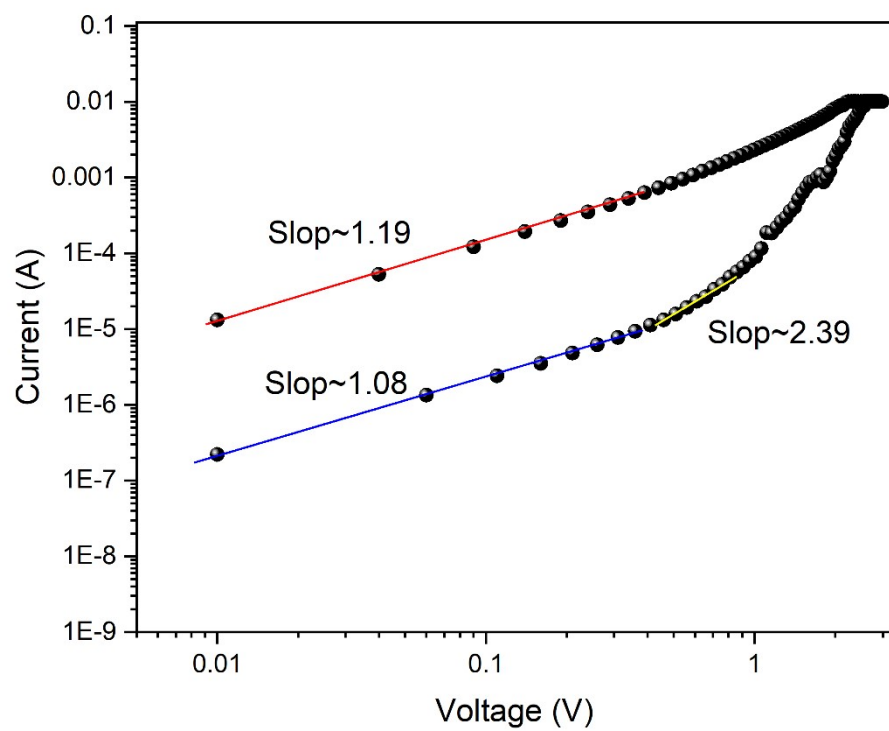

**Fig. S5** The logarithmic I–V plots for the positive-voltage region of the AgBiI<sub>4</sub> device.

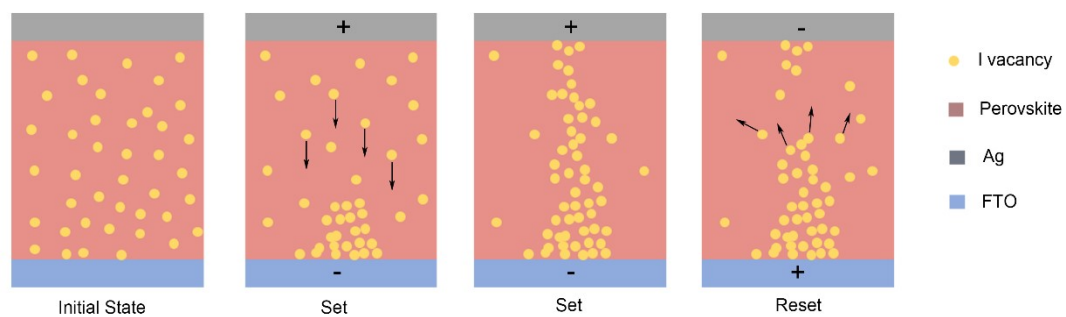

**Fig. S6** Schematic illustration of the formation and disruption of the  $V_I$  conductive filaments.

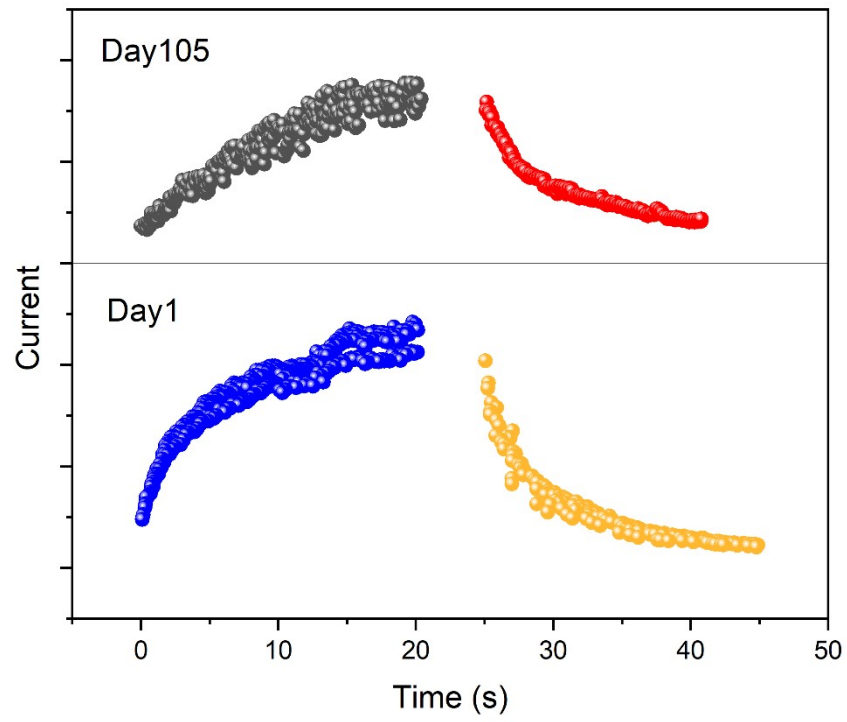

**Fig. S7** the LTP and LTD characteristics of the device before and after storage.



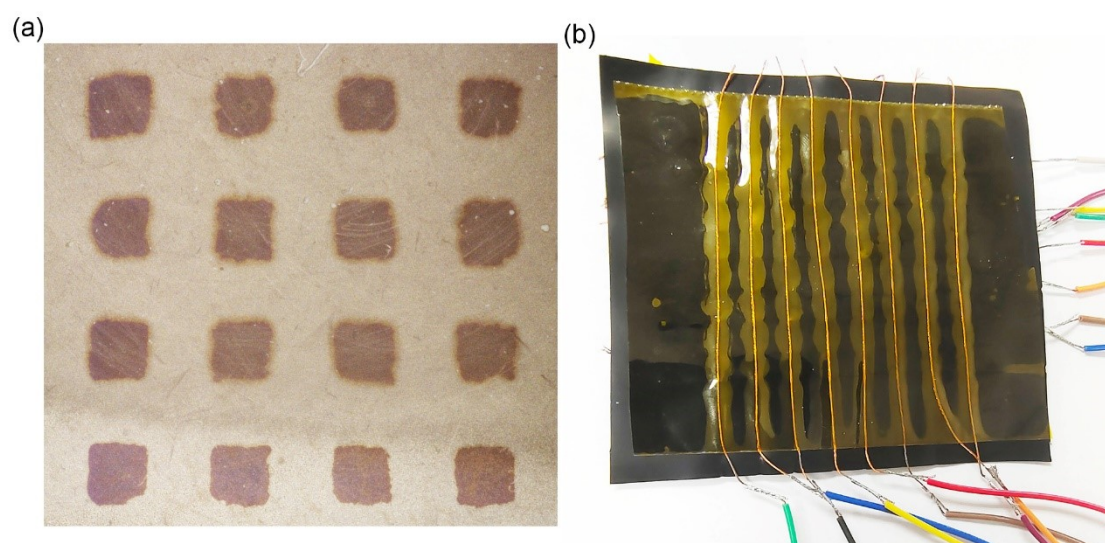

**Fig. S8** The photographs of (a) the AgBiI<sub>4</sub> artificial synaptic device and (b) the tactile sensor.

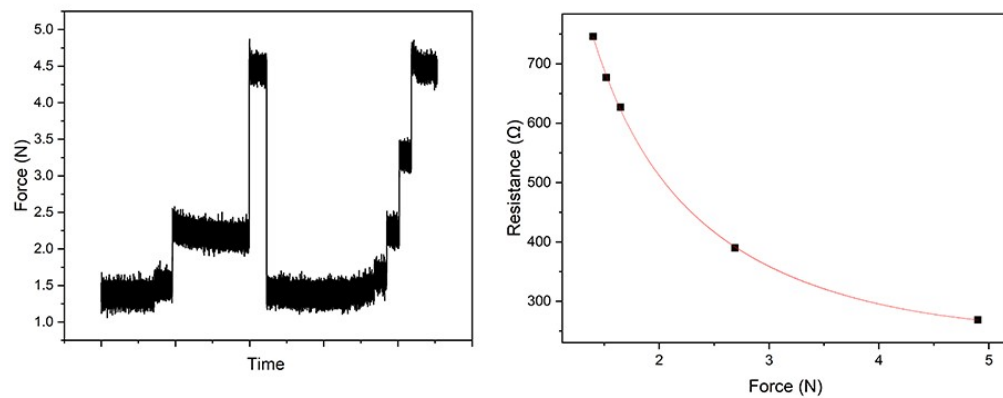

**Fig. S9** The pressure response of the tactile sensor.

Table. S1 Element ratios of AgBiI<sub>4</sub> layer from XPS survey.

| Element | Atomic (%) |
|---------|------------|
| Ag      | 9.18       |
| Bi      | 9.44       |
| I       | 42.38      |
